# Supplementary material
Source: PubMed Central journal article supplement (PMC2742751)

# **CFTR Regulation of Intracellular pH and Ceramides Is Required for Lung Endothelial Cell Apoptosis**

Julie Noe<sup>1</sup>, Daniela Petrusca<sup>2</sup>, Natalia Rush<sup>2</sup>, Ping Deng<sup>3</sup>, Mary VanDemark<sup>2</sup>, Evgeny Berdyshev<sup>4</sup>, Yuan Gu<sup>2</sup>, Patricia Smith<sup>2</sup>, Kelly Schweitzer<sup>2</sup>, Joseph Pilewsky<sup>6</sup>,  
Viswanathan Natarajan<sup>5</sup>, Zao Xu<sup>3</sup>, Alexander G. Obukhov<sup>4</sup>, and Irina Petrache<sup>2</sup>

<sup>1</sup>Section of Pulmonology and Critical Care, Department of Pediatrics, <sup>2</sup>Division of Pulmonary, Allergy, Critical Care and Occupational Medicine, <sup>3</sup>Department of Anatomy, and <sup>4</sup>Department of Cellular and Integrative Physiology, Indiana University; <sup>5</sup>Division of Pulmonary and Critical Care Medicine, University of Chicago, Chicago, Illinois; and <sup>6</sup>Division of Pulmonary, and Critical Care Medicine, University of Pittsburgh, Pittsburgh, Pennsylvania

**Online Data Supplement**

**Figure E1.** LDH release from untreated (C) mouse lung endothelial cells, and from cells treated with vehicle (V) or the indicated concentrations of specific CFTR inhibitors (DPC and NPPB), non-CFTR Cl<sup>-</sup> channel inhibitor DIDS, and CFTR activator genistein. The duration of treatment was 30 min or 16 h (the latter noted as subscript b) The LDH released was expressed as % of maximal LDH released from lysed cells (mean +/- SEM; n=3; \* p<0.05 versus vehicle).

Supplementary Figure 1.

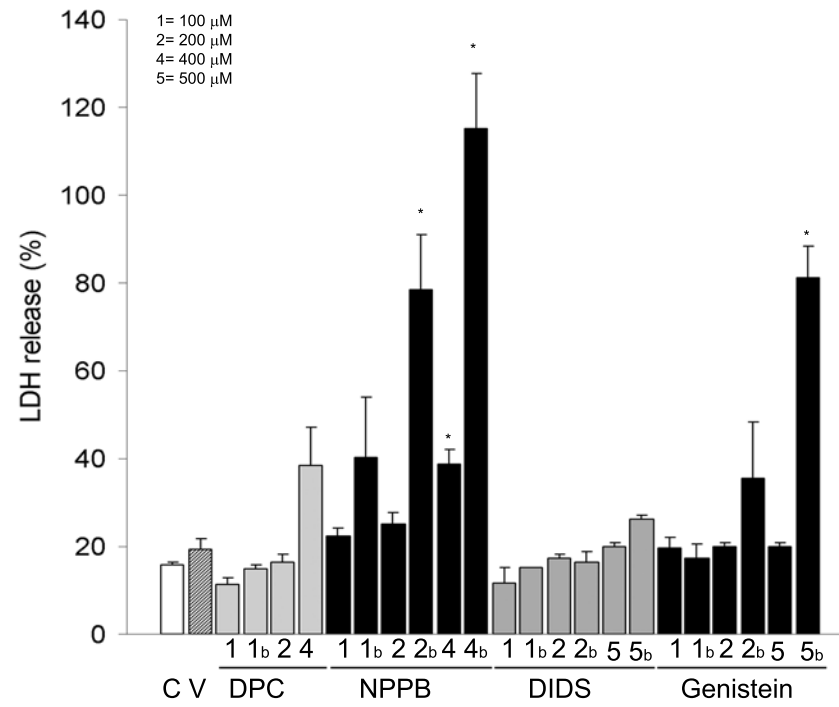

Supplement: supp_41_3_314__1.pdf [file supp_41_3_314__1.pdf]
